# Supplementary material
Source: ML conference proceedings conference paper supplement (https://proceedings.neurips.cc/paper_files/paper/2021/hash/5aa3405a3f865c10f420a4a7b55cbff3-Abstract.html)
Supplement: Supplementary file 1 [file 5aa3405a3f865c10f420a4a7b55cbff3-Supplemental.pdf]

# What Makes Multi-modal Learning Better than Single (Provably)

Yu Huang<sup>1,\*</sup>, Chenzhuang Du<sup>1,\*</sup>, Zihui Xue<sup>2</sup>, Xuanyao Chen<sup>3,4</sup>,

Hang Zhao<sup>1,4</sup>, Longbo Huang<sup>1,†</sup>

<sup>1</sup> Institute for Interdisciplinary Information Sciences, Tsinghua University

<sup>2</sup> The University of Texas at Austin <sup>3</sup> Fudan University

<sup>4</sup> Shanghai Qi Zhi Institute

## Appendices

### A Proof of Main Results

#### A.1 Proof of Theorem 1

*Proof.* Let  $h'_{\mathcal{M}}$  denote the minimizer of the population risk over  $\mathcal{D}$  with the representation  $\hat{g}_{\mathcal{M}}$ , then we can decompose the difference between  $r(\hat{h}_{\mathcal{M}} \circ \hat{g}_{\mathcal{M}}) - r(\hat{h}_{\mathcal{N}} \circ \hat{g}_{\mathcal{N}})$  into two parts:

$$r(\hat{h}_{\mathcal{M}} \circ \hat{g}_{\mathcal{M}}) - r(\hat{h}_{\mathcal{N}} \circ \hat{g}_{\mathcal{N}}) \quad (1)$$

$$= \underbrace{r(\hat{h}_{\mathcal{M}} \circ \hat{g}_{\mathcal{M}}) - r(h'_{\mathcal{M}} \circ \hat{g}_{\mathcal{M}})}_{J_1} + \underbrace{r(h'_{\mathcal{M}} \circ \hat{g}_{\mathcal{M}}) - r(\hat{h}_{\mathcal{N}} \circ \hat{g}_{\mathcal{N}})}_{J_2} \quad (2)$$

$J_1$  can further be decomposed into:

$$J_1 = \underbrace{r(\hat{h}_{\mathcal{M}} \circ \hat{g}_{\mathcal{M}}) - \hat{r}(\hat{h}_{\mathcal{M}} \circ \hat{g}_{\mathcal{M}})}_{J_{11}} + \underbrace{\hat{r}(\hat{h}_{\mathcal{M}} \circ \hat{g}_{\mathcal{M}}) - \hat{r}(h'_{\mathcal{M}} \circ \hat{g}_{\mathcal{M}})}_{J_{12}} \quad (3)$$

$$+ \underbrace{\hat{r}(h'_{\mathcal{M}} \circ \hat{g}_{\mathcal{M}}) - r(h'_{\mathcal{M}} \circ \hat{g}_{\mathcal{M}})}_{J_{13}} \quad (4)$$

$$(5)$$

Clearly,  $J_{12} \leq 0$  since  $\hat{h}_{\mathcal{M}}$  is the minimizer of the empirical risk over  $\mathcal{D}$  with the representation  $\hat{g}_{\mathcal{M}}$ . And  $J_{11} + J_{13} \leq 2 \sup_{h \in \mathcal{H}, g_{\mathcal{M}} \in \mathcal{G}_{\mathcal{M}}} |r(h \circ g_{\mathcal{M}}) - \hat{r}(h \circ g_{\mathcal{M}})|$ .

$$\begin{aligned} & \sup_{h \in \mathcal{H}, g_{\mathcal{M}} \in \mathcal{G}_{\mathcal{M}}} |\hat{r}(h \circ g_{\mathcal{M}}) - r(h \circ g_{\mathcal{M}})| \\ &= \sup_{h \in \mathcal{H}, g_{\mathcal{M}} \in \mathcal{G}_{\mathcal{M}}} \left| \frac{1}{m} \sum_{i=1}^m \ell(h \circ g_{\mathcal{M}}(\mathbf{x}_i), y_i) - \mathbb{E}_{(\mathbf{x}', y') \sim \mathcal{D}} [\ell(h \circ g_{\mathcal{M}}(\mathbf{x}'), y')] \right| \end{aligned}$$

\*equal contribution

†Correspondence to: longbohuang@tsinghua.edu.cn

Since  $\ell$  is bounded by a constant  $C$ , we have  $0 \leq \ell(h \circ g_{\mathcal{M}}(\mathbf{x}), y) \leq C$  for any  $(\mathbf{x}, y)$ . As one pair  $(\mathbf{x}_i, y_i)$  changes, the above equation cannot change by at most  $\frac{2C}{m}$ . Applying McDiarmid's[4] inequality, we obtain that with probability  $1 - \delta/2$ :

$$\sup_{h \in \mathcal{H}, g_{\mathcal{M}} \in \mathcal{G}_{\mathcal{M}}} |\hat{r}(h \circ g_{\mathcal{M}}) - r(h \circ g_{\mathcal{M}})| \quad (6)$$

$$\leq \mathbb{E}_{(\mathbf{x}_i, y_i) \sim \mathcal{D}} \sup_{h \in \mathcal{H}, g_{\mathcal{M}} \in \mathcal{G}_{\mathcal{M}}} \left| \frac{1}{m} \sum_{i=1}^m \ell(h \circ g_{\mathcal{M}}(\mathbf{x}_i), y_i) - \mathbb{E}_{(\mathbf{x}', y') \sim \mathcal{D}} [\ell(h \circ g_{\mathcal{M}}(\mathbf{x}'), y')] \right| \quad (7)$$

$$+ C \sqrt{\frac{2 \ln(2/\delta)}{m}} \quad (8)$$

To proceed the proof, we introduce a popular result of Rademacher complexity in the following lemma[2]:

**Lemma 1.** Let  $U, \{U_i\}_{i=1}^m$  be i.i.d. random variables taking values in some space  $\mathcal{U}$  and  $\mathcal{F} \subseteq [a, b]^{\mathcal{U}}$  is a set of bounded functions. We have

$$\mathbb{E} \left[ \sup_{f \in \mathcal{F}} \left( \mathbb{E}[f(U)] - \frac{1}{m} \sum_{i=1}^m f(U_i) \right) \right] \leq 2\mathfrak{R}_m(\mathcal{F}) \quad (9)$$

*Proof of lemma 1.* Denote  $\{U'_i\}_{i=1}^m$  be ghost examples of  $\{U_i\}_{i=1}^m$ , i.e.  $U'_i$  be independent of each other and have the same distribution as  $U_i$ . Then we have,

$$\mathbb{E} \left[ \sup_{f \in \mathcal{F}} \left( \mathbb{E}[f(U)] - \frac{1}{m} \sum_{i=1}^m f(U_i) \right) \right] \quad (10)$$

$$= \mathbb{E} \left[ \sup_{f \in \mathcal{F}} \left( \frac{1}{m} \sum_{i=1}^m (\mathbb{E}[f(U)] - f(U_i)) \right) \right] \quad (11)$$

$$\stackrel{(a)}{=} \mathbb{E} \left[ \sup_{f \in \mathcal{F}} \left( \frac{1}{m} \sum_{i=1}^m \mathbb{E}[f(U'_i) - f(U_i) \mid \{U_i\}_{i=1}^m] \right) \right] \quad (12)$$

$$\leq \mathbb{E} \left[ \mathbb{E} \left[ \sup_{f \in \mathcal{F}} \left( \frac{1}{m} \sum_{i=1}^m (f(U'_i) - f(U_i)) \right) \mid \{U_i\}_{i=1}^m \right] \right] \quad (13)$$

$$\stackrel{(b)}{=} \mathbb{E} \left[ \sup_{f \in \mathcal{F}} \left( \frac{1}{m} \sum_{i=1}^m (f(U'_i) - f(U_i)) \right) \right] \quad (14)$$

$$= \mathbb{E} \left[ \sup_{f \in \mathcal{F}} \left( \frac{1}{m} \sum_{i=1}^m \sigma_i (f(U'_i) - f(U_i)) \right) \right] \quad (15)$$

$$\leq \mathbb{E} \left[ \sup_{f \in \mathcal{F}} \frac{1}{m} \sum_{i=1}^m \sigma_i f(U'_i) \right] + \mathbb{E} \left[ \sup_{f \in \mathcal{F}} \frac{1}{m} \sum_{i=1}^m \sigma_i f(U_i) \right] \quad (16)$$

$$\stackrel{(c)}{=} 2\mathfrak{R}_m(\mathcal{F}). \quad (17)$$

where  $\sigma_1, \dots, \sigma_m$  is i.i.d.  $\{\pm 1\}$ -valued random variables with  $\mathbb{P}(\sigma_i = +1) = \mathbb{P}(\sigma_i = -1) = 1/2$ . (a) (b) are obtained by the tower property of conditional expectation; (c) follows from the definition of Rademacher complexity of  $\mathcal{F}$ .  $\square$

Consider the function class:

$$\ell_{\mathcal{H} \circ \mathcal{G}_{\mathcal{M}}} := \{(\mathbf{x}, y) \mapsto \ell(h \circ g_{\mathcal{M}}(\mathbf{x}), y) \mid h \in \mathcal{H}, g_{\mathcal{M}} \in \mathcal{G}_{\mathcal{M}}\}$$

let  $\mathcal{F} = \ell_{\mathcal{H} \circ \mathcal{G}_{\mathcal{M}}}$  in lemma 1, then we have equation (7) can be upper bound by  $2\mathfrak{R}_m(\ell_{\mathcal{H} \circ \mathcal{G}_{\mathcal{M}}})$ . To directly work with the hypothesis function class, we need to decompose the Rademacher term which

consists of the loss function classes. We center the function  $\ell'(h \circ g_{\mathcal{M}}(\mathbf{x}), y) = \ell(h \circ g_{\mathcal{M}}(\mathbf{x}), y) - \ell(\mathbf{0}, y)$ . The constant-shift property of Rademacher averages[2] indicates that

$$\mathfrak{R}_m(\ell_{\mathcal{H} \circ \mathcal{G}_{\mathcal{M}}}) \leq \mathfrak{R}_m(\ell'_{\mathcal{H} \circ \mathcal{G}_{\mathcal{M}}}) + \frac{C}{\sqrt{m}}$$

Since  $\ell'$  is Lipschitz in its first coordinate with constant  $L$  and  $\ell'(h \circ g_{\mathcal{M}}(\mathbf{0}), y) = 0$ , applying the contraction principle[2], we have:

$$\mathfrak{R}_m(\ell'_{\mathcal{H} \circ \mathcal{G}_{\mathcal{M}}}) \leq 2L\mathfrak{R}_m(\mathcal{H} \circ G_{\mathcal{M}})$$

Combining the above discussion, we obtain:

$$J_1 \leq 8L\mathfrak{R}_m(\mathcal{H} \circ G_{\mathcal{M}}) + \frac{4C}{\sqrt{m}} + 2C\sqrt{\frac{2\ln(2/\delta)}{m}}$$

For  $J_2$ , by the definition of  $h'_{\mathcal{M}}$ :

$$J_2 = \inf_{h_{\mathcal{M}} \in \mathcal{H}} \left[ r(h_{\mathcal{M}} \circ \hat{g}_{\mathcal{M}}) - r(\hat{h}_{\mathcal{N}} \circ \hat{g}_{\mathcal{N}}) \right] \quad (18)$$

$$\leq \sup_{h_{\mathcal{N}} \in \mathcal{H}} \inf_{h_{\mathcal{M}} \in \mathcal{H}} [r(h_{\mathcal{M}} \circ \hat{g}_{\mathcal{M}}) - r(h_{\mathcal{N}} \circ \hat{g}_{\mathcal{N}})] \quad (19)$$

$$= \inf_{h_{\mathcal{M}} \in \mathcal{H}} [r(h_{\mathcal{M}} \circ \hat{g}_{\mathcal{M}}) - r(h^* \circ g^*)] - \inf_{h_{\mathcal{N}} \in \mathcal{H}} [r(h_{\mathcal{N}} \circ \hat{g}_{\mathcal{N}}) - r(h^* \circ g^*)] \quad (20)$$

$$= \eta(\hat{g}_{\mathcal{M}}) - \eta(\hat{g}_{\mathcal{N}}) \quad (21)$$

$$= \gamma_S(\mathcal{M}, \mathcal{N}) \quad (22)$$

Finally,

$$r(\hat{h}_{\mathcal{M}} \circ \hat{g}_{\mathcal{M}}) - r(\hat{h}_{\mathcal{N}} \circ \hat{g}_{\mathcal{N}}) \leq \gamma_S(\mathcal{M}, \mathcal{N}) + 8L\mathfrak{R}_m(\mathcal{H} \circ \mathcal{G}_{\mathcal{M}}) + \frac{4C}{\sqrt{m}} + 2C\sqrt{\frac{2\ln(2/\delta)}{m}}$$

with probability  $1 - \frac{\delta}{2}$ .  $\square$

## A.2 Proof of Theorem 2

*Proof.* Let  $\tilde{h}_{\mathcal{M}}$  denote the minimizer of the population risk over  $\mathcal{D}$  with the representation  $\hat{g}_{\mathcal{M}}$ , then we have:

$$\eta(\hat{g}_{\mathcal{M}}) \quad (23)$$

$$= r(\tilde{h}_{\mathcal{M}} \circ \hat{g}_{\mathcal{M}}) - r(h^* \circ g^*) \quad (24)$$

$$\leq \underbrace{r(\hat{h}_{\mathcal{M}} \circ \hat{g}_{\mathcal{M}}) - \hat{r}(\hat{h}_{\mathcal{M}} \circ \hat{g}_{\mathcal{M}})}_{J_1} + \underbrace{\hat{r}(\hat{h}_{\mathcal{M}} \circ \hat{g}_{\mathcal{M}}) - \hat{r}(h^* \circ g^*)}_{J_2} + \underbrace{\hat{r}(h^* \circ g^*) - r(h^* \circ g^*)}_{J_3} \quad (25)$$

$J_2$  is the centering empirical risk. Following the similar analysis in Theorem 1, we obtain:

$$J_1 + J_3 \leq \sup_{h \in \mathcal{H}, g_{\mathcal{M}} \in \mathcal{G}_{\mathcal{M}}} |r(h \circ g_{\mathcal{M}}) - \hat{r}(h \circ g_{\mathcal{M}})| + \sup_{h \in \mathcal{H}, g \in \mathcal{G}} |r(h \circ g) - \hat{r}(h \circ g)| \quad (26)$$

$$\leq 4L\mathfrak{R}_m(\mathcal{H} \circ \mathcal{G}_{\mathcal{M}}) + 4L\mathfrak{R}_m(\mathcal{H} \circ \mathcal{G}) + \frac{4C}{\sqrt{m}} + 2C\sqrt{\frac{2\ln(2/\delta)}{m}} \quad (27)$$

with probability  $1 - \delta$ . Combining the above discussion yields the result:

$$\eta(\hat{g}_{\mathcal{M}}) \leq \quad (28)$$

$$4L\mathfrak{R}_m(\mathcal{H} \circ \mathcal{G}_{\mathcal{M}}) + 4L\mathfrak{R}_m(\mathcal{H} \circ \mathcal{G}) + \frac{4C}{\sqrt{m}} + 2C\sqrt{\frac{2\ln(2/\delta)}{m}} + \hat{L}(\hat{h}_{\mathcal{M}} \circ \hat{g}_{\mathcal{M}}, \mathcal{S}) \quad (29)$$

$\square$

### A.3 Proof of Proposition 1

*Proof.* With the  $l_2$  loss, we have

$$\mathbb{E}_{\mathbf{x}, y \sim h^* \circ g^*(\mathbf{x})} \{ \ell(h \circ g(\mathbf{x}), y) - \ell(h^* \circ g^*(\mathbf{x}), y) \} = \mathbb{E}_{\mathbf{x}} \left[ \left| \beta^\top \mathbf{A}^\top \mathbf{x} - \beta^{*\top} \mathbf{A}^{*\top} \mathbf{x} \right|^2 \right]$$

Define the covariance matrix[9] for two linear projections  $\mathbf{A}, \mathbf{A}'$  as follows:

$$\begin{aligned} \Gamma(\mathbf{A}, \mathbf{A}') &= \mathbb{E}_{\mathbf{x}} \begin{bmatrix} \mathbf{A}^\top \mathbf{x} (\mathbf{A}^\top \mathbf{x})^\top & \mathbf{A}^\top \mathbf{x} (\mathbf{A}'^\top \mathbf{x})^\top \\ \mathbf{A}'^\top \mathbf{x} (\mathbf{A}^\top \mathbf{x})^\top & \mathbf{A}'^\top \mathbf{x} (\mathbf{A}'^\top \mathbf{x})^\top \end{bmatrix} \\ &= \begin{bmatrix} \mathbf{A}^\top \Sigma \mathbf{A} & \mathbf{A}^\top \Sigma \mathbf{A}' \\ \mathbf{A}'^\top \Sigma \mathbf{A} & \mathbf{A}'^\top \Sigma \mathbf{A}' \end{bmatrix} = \begin{bmatrix} \Gamma_{11}(\mathbf{A}, \mathbf{A}^*) & \Gamma_{12}(\mathbf{A}, \mathbf{A}^*) \\ \Gamma_{21}(\mathbf{A}, \mathbf{A}^*) & \Gamma_{22}(\mathbf{A}, \mathbf{A}^*) \end{bmatrix} \end{aligned} \quad (30)$$

where  $\Sigma$  denotes the covariance matrix of the distribution  $\mathbb{P}_{\mathbf{x}}$ . Then the *latent representation quality* of  $\mathbf{A}$  becomes:

$$\eta(\mathbf{A}) = \inf_{\beta: \|\beta\| \leq C_b} \mathbb{E}_{\mathbf{x}} \left[ \left| \beta^\top \mathbf{A}^\top \mathbf{x} - \beta^{*\top} \mathbf{A}^{*\top} \mathbf{x} \right|^2 \right] \quad (31)$$

$$= \inf_{\beta: \|\beta\| \leq C_b} [\beta, -\beta^*] \Gamma(\mathbf{A}, \mathbf{A}^*) [\beta, -\beta^*]^\top \quad (32)$$

For sufficiently large  $C_b$ , the constrained minimizer of (32) is equivalent to the unconstrained minimizer. Following the standard discussion of the quadratic convex optimization [3], if  $\Gamma_{11}(\mathbf{A}, \mathbf{A}^*) \succ 0$  and  $\det \Gamma_{11}(\mathbf{A}, \mathbf{A}^*) \neq 0$ , the solution of the above minimization problem is  $\beta = \Gamma_{11}(\mathbf{A}, \mathbf{A}^*)^{-1} \Gamma_{12}(\mathbf{A}, \mathbf{A}^*) \beta^*$ , and

$$\eta(\mathbf{A}) = \beta^* \Gamma_{sch}(\mathbf{A}, \mathbf{A}^*) \beta^{*\top} \quad (33)$$

where  $\Gamma_{sch}(\mathbf{A}, \mathbf{A}^*)$  is the Schur complement of  $\Gamma(\mathbf{A}, \mathbf{A}^*)$ , defined as:

$$\Gamma_{sch}(\mathbf{A}, \mathbf{A}^*) \quad (34)$$

$$= \Gamma_{22}(\mathbf{A}, \mathbf{A}^*) - \Gamma_{21}(\mathbf{A}, \mathbf{A}^*) \Gamma_{11}(\mathbf{A}, \mathbf{A}^*)^{-1} \Gamma_{12}(\mathbf{A}, \mathbf{A}^*) \quad (35)$$

Under the orthogonal assumption,  $\hat{\mathbf{A}}_{\mathcal{M}}$  is nonsingular. Notice that  $\hat{\mathbf{A}}_{\mathcal{N}}$  cannot be orthonormal in our settings. And  $\Sigma$  is also invertible. Therefore, the Schur complement of  $\Gamma(\hat{\mathbf{A}}_{\mathcal{M}}, \mathbf{A}^*)$  exists,

$$\Gamma_{sch}(\hat{\mathbf{A}}_{\mathcal{M}}, \mathbf{A}^*) = \mathbf{A}^{*\top} \Sigma \mathbf{A}^* - \left( \mathbf{A}^{*\top} \Sigma \hat{\mathbf{A}}_{\mathcal{M}} \right) \left( \hat{\mathbf{A}}_{\mathcal{M}}^\top \Sigma \hat{\mathbf{A}}_{\mathcal{M}} \right)^{-1} \left( \hat{\mathbf{A}}_{\mathcal{M}}^\top \Sigma \mathbf{A}^* \right) = \mathbf{0} \quad (36)$$

Hence,  $\eta(\hat{\mathbf{A}}_{\mathcal{M}}) = 0$ . Given the above discussion, we obtain:

$$\gamma_S(\mathcal{M}, \mathcal{N}) = \eta(\hat{\mathbf{A}}_{\mathcal{M}}) - \eta(\hat{\mathbf{A}}_{\mathcal{N}}) \quad (37)$$

$$= 0 - \inf_{\beta: \|\beta\| \leq C_b} \mathbb{E}_{\mathbf{x}} \left[ \left| \beta^\top \hat{\mathbf{A}}_{\mathcal{N}}^\top \mathbf{x} - \beta^{*\top} \mathbf{A}^{*\top} \mathbf{x} \right|^2 \right] \leq 0 \quad (38)$$

□

## B The Composite Framework in Applications

As we stated in Section 3, our model well captures the essence of lots of existing multi-modal methods [1, 6, 7, 11, 10, 8]. Below, we explicitly discuss how these methods fit well into our general model, by providing the corresponding function class  $\mathcal{G}$  under each method.

**Audiovisual fusion for sound recognition [6]:** The audio and visual models map the respective inputs to segment-level representations, which are then used to obtain single-modal predictions,  $\mathbf{h}_a$  and  $\mathbf{h}_v$ , respectively. The attention fusion function  $n_{attn}$ , ingests the single-modal predictions,  $\mathbf{h}_a$  and  $\mathbf{h}_v$ , to produce weights for each modality,  $\alpha_a$  and  $\alpha_v$ . The single-modal audio and visual predictions,  $\mathbf{h}_a$  and  $\mathbf{h}_v$ , are mapped to  $\tilde{\mathbf{h}}_a$  and  $\tilde{\mathbf{h}}_v$  via functions  $n_a$  and  $n_v$  respectively, and fused using the attention weights,  $\alpha_a$  and  $\alpha_v$ . In summary,  $g$  has the form:

$$g = \tilde{\mathbf{h}}_{av} = \alpha_a \odot \tilde{\mathbf{h}}_a + \alpha_v \odot \tilde{\mathbf{h}}_v$$

**Channel-Exchanging-Network [11]:** A feature map will be replaced by that of other modalities at the same position, if its scaling factor is lower than a threshold.  $g$  in this problem can be formulated as a multi-dimensional mapping  $g := (f_1, \dots, f_M)$ , where subnetwork  $f_m(x)$  adopts the multi-modal data  $x$  as input and fuses multi-modal information by channel exchanging.

**Other Fusion Methods [7, 10, 8, 1]:** Methods in these works can be formulated into the form we mentioned in the example in Section 3. Specifically, recall the example,  $g$  has the form:  $\varphi_1 \oplus \varphi_2 \oplus \dots \oplus \varphi_M$ , where  $\oplus$  denotes a fusion operation, (e.g., averaging, concatenation, and self-attention), and  $\varphi_k$  is a deep network which uses each modality data  $x^{(k)}$  as input. Under these notations:

- For the early-fusion BERT method in [8], the temporal features are concatenated before the BERT layer and only a single BERT module is utilized. Here, the  $\oplus$  is a concatenation function, and  $g$  has the form  $(\varphi_1, \varphi_2)$ .
- [10, 7] discussed different fusion methods by choosing  $\oplus$ . (i) Max fusion: the  $\oplus$  is the maximum function and  $g := \max\{\varphi_1, \dots, \varphi_M\}$ ; (ii) Sum fusion:  $g := \sum \varphi_m$ ; (iii) averaging; (iv) self-attention and so on.
- The fusion section in the survey [1] provides many works which can be incorporated into our framework.

## C Discussions on Training Setting

Existing works on multi-modal training demonstrates that naively fusing different modalities results insufficient representation learning of each modality [10, 5]. In our experiments, we train our multi-modal model using two methods: (1), naively end-to-end late-fusion training; (2), firstly train the uni-modal models and train a multi-modal classifier over the uni-modal encoders. As shown in Table 1 and Table 2, naively end-to-end training is unstable, affecting the representation learning of each modality, while fine-tuning a multi-modal classifier over trained uni-modal encoders is more stable and the results are more consistent with our theory. Noting that we use the late-fusion framework here, similar to [10, 5].

Table 1: Latent representation quality vs. The number of the sample size on IEMOCAP. In this table, we show the results from naively end-to-end late-fusion training

| Modalities | Test Acc (Ratio of Sample Size) |                   |                   |                   |                   |
|------------|---------------------------------|-------------------|-------------------|-------------------|-------------------|
|            | $10^{-4}$                       | $10^{-3}$         | $10^{-2}$         | $10^{-1}$         | 1                 |
| T          | 23.66±1.28                      | 29.08±3.34        | 45.63±0.29        | 48.30±1.31        | 49.93±0.57        |
| TA         | <b>25.06±1.05</b>               | 34.28±4.54        | <b>47.28±1.24</b> | 50.46±0.61        | 51.08±0.66        |
| TV         | 24.71±0.87                      | <b>38.37±3.12</b> | 46.54±1.62        | 49.50±1.04        | 53.03±0.21        |
| TVA        | 24.71±0.76                      | 32.24±1.17        | 46.39±3.82        | <b>50.75±1.45</b> | <b>53.89±0.47</b> |

Table 2: Latent representation quality vs. The number of the sample size on IEMOCAP. In this table, we firstly train the uni-modal models and train a multi-modal classifier over the uni-modal encoders to get multi-modal results.

| Modalities | Test Acc (Ratio of Sample Size) |                   |                   |                   |                   |
|------------|---------------------------------|-------------------|-------------------|-------------------|-------------------|
|            | $10^{-4}$                       | $10^{-3}$         | $10^{-2}$         | $10^{-1}$         | 1                 |
| T          | 23.66±1.28                      | 29.08±3.34        | 45.63±0.29        | 48.30±1.31        | 49.93±0.57        |
| TA         | 22.74±1.86                      | 35.14±0.38        | 49.15±0.43        | 50.61±0.28        | 51.78±0.08        |
| TV         | 23.64±0.07                      | 36.64±1.79        | 46.91±0.68        | 48.96±0.47        | 53.24±0.35        |
| TVA        | <b>25.40±1.06</b>               | <b>40.87±2.47</b> | <b>50.67±0.63</b> | <b>52.54±0.60</b> | <b>54.55±0.29</b> |

## References

- [1] Tadas Baltrušaitis, Chaitanya Ahuja, and Louis-Philippe Morency. Multimodal machine learning: A survey and taxonomy. *IEEE transactions on pattern analysis and machine intelligence*, 41(2):423–443, 2018.
- [2] Peter L Bartlett and Shahar Mendelson. Rademacher and gaussian complexities: Risk bounds and structural results. *Journal of Machine Learning Research*, 3(Nov):463–482, 2002.
- [3] Stephen Boyd, Stephen P Boyd, and Lieven Vandenberghe. *Convex optimization*. Cambridge university press, 2004.
- [4] Koby Crammer, Michael Kearns, and Jennifer Wortman. Learning from multiple sources. *Journal of Machine Learning Research*, 9(8), 2008.
- [5] Chenzhuang Du, Tingle Li, Yichen Liu, Zixin Wen, Tianyu Hua, Yue Wang, and Hang Zhao. Improving multi-modal learning with uni-modal teachers. *arXiv preprint arXiv:2106.11059*, 2021.
- [6] Haytham M Fayek and Anurag Kumar. Large scale audiovisual learning of sounds with weakly labeled data. *arXiv preprint arXiv:2006.01595*, 2020.
- [7] Christoph Feichtenhofer, Axel Pinz, and Andrew Zisserman. Convolutional two-stream network fusion for video action recognition. In *Proceedings of the IEEE conference on computer vision and pattern recognition*, pages 1933–1941, 2016.
- [8] M Esat Kalfaoglu, Sinan Kalkan, and A Aydin Alatan. Late temporal modeling in 3d cnn architectures with bert for action recognition. In *European Conference on Computer Vision*, pages 731–747. Springer, 2020.
- [9] Nilesh Tripuraneni, Michael Jordan, and Chi Jin. On the theory of transfer learning: The importance of task diversity. *Advances in Neural Information Processing Systems*, 33, 2020.
- [10] Weiyao Wang, Du Tran, and Matt Feiszli. What makes training multi-modal classification networks hard? In *2020 IEEE/CVF Conference on Computer Vision and Pattern Recognition (CVPR)*, pages 12692–12702. IEEE, 2020.
- [11] Yikai Wang, Wenbing Huang, Fuchun Sun, Tingyang Xu, Yu Rong, and Junzhou Huang. Deep multimodal fusion by channel exchanging. *Advances in Neural Information Processing Systems*, 33, 2020.
